# Supplementary material
Source: publisher site journal article supplement (https://www.spandidos-publications.com/3972/downloadSupplementary)

Figure S1. CDCA3 protein expression levels in various cell lines obtained by analyzing the Harmonizome database. CDCA3, cell division cycle-associated 3.

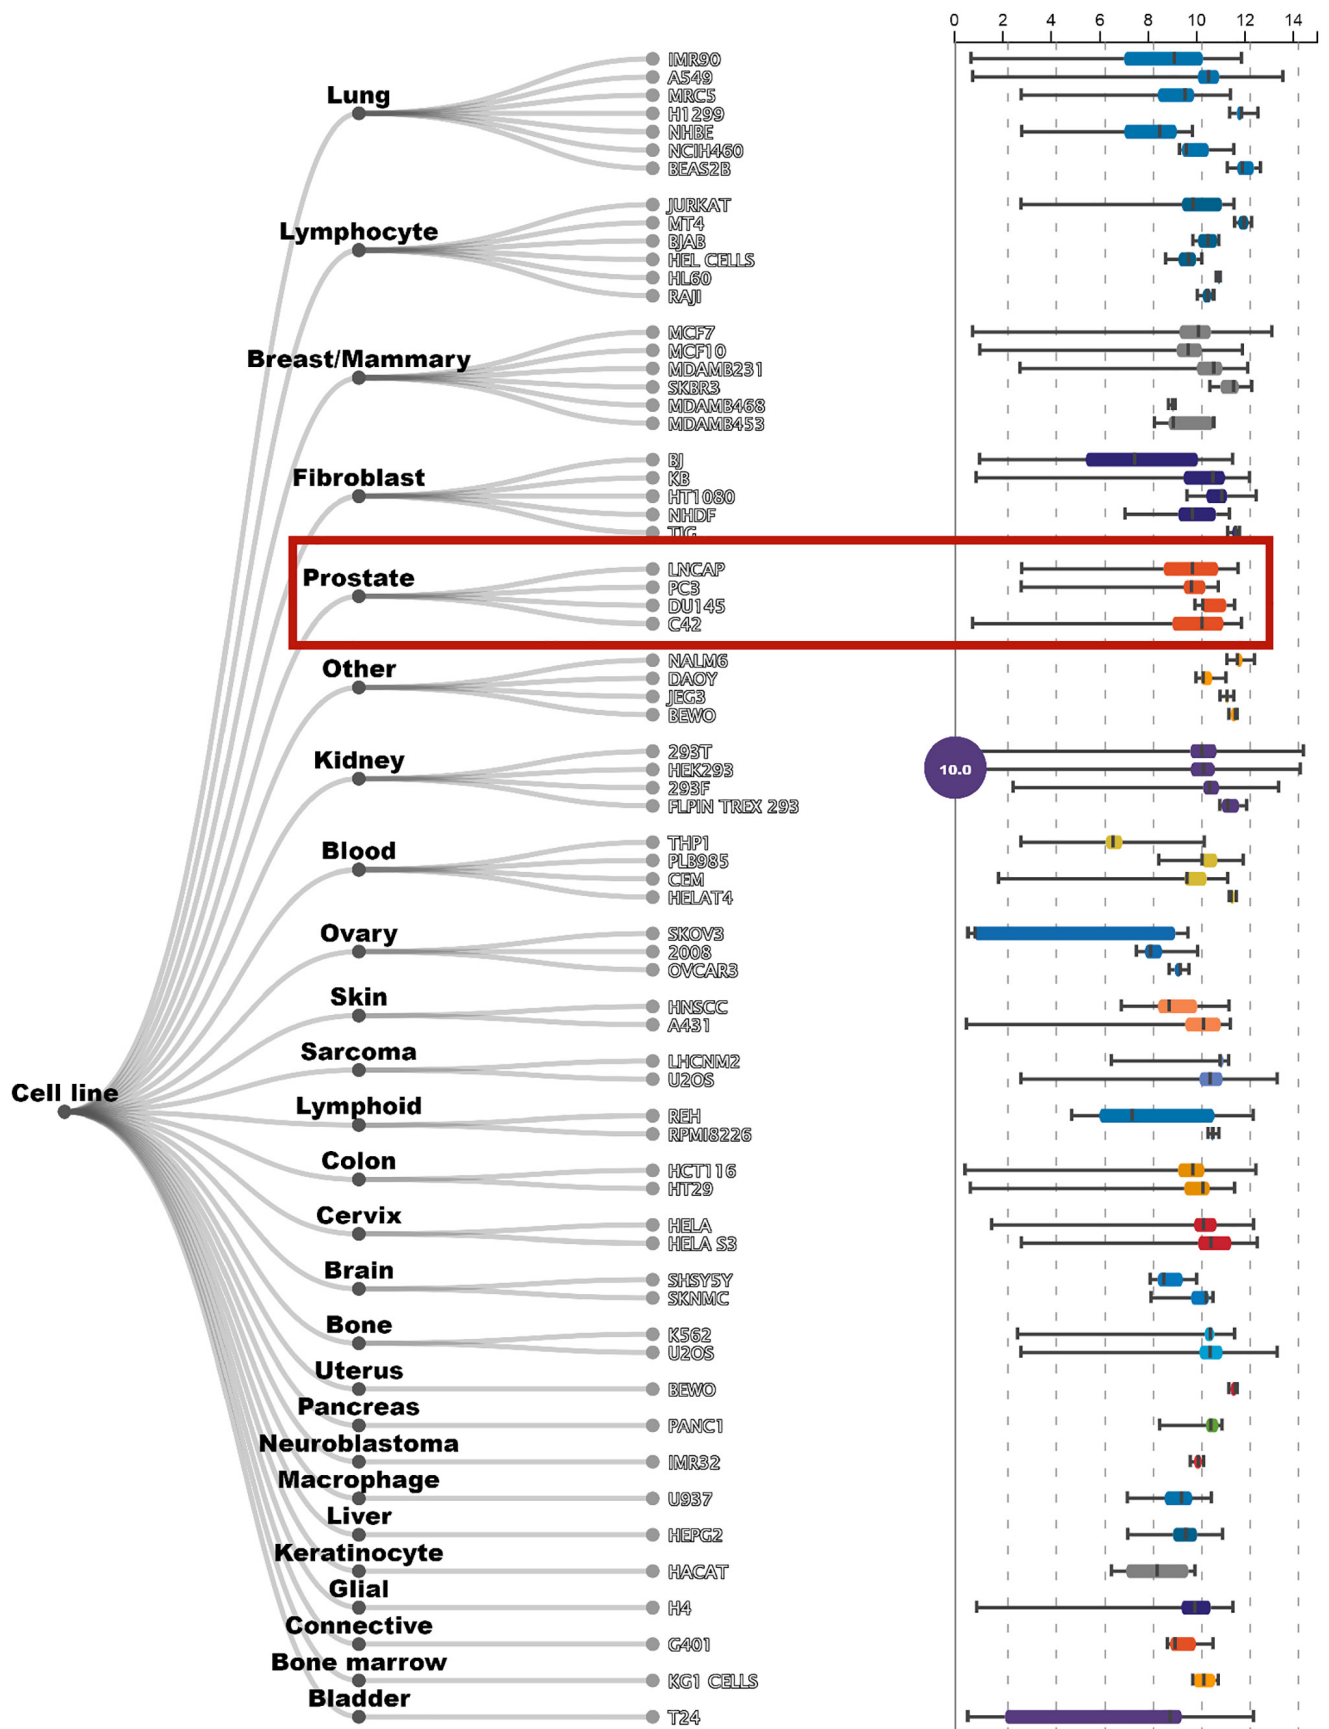

Supplement: Supplementary file 1 [file downloadSupplementary]
